# Supplementary material for: Conflict and displacement as drivers of first‑dose measles vaccine coverage in Somalia: An ecological analysis
Source: Research Square preprint supplement (doi:10.21203/rs.3.rs-7235155/v1), 2025-08-18
Supplement: Supplementary file 1 [file 2379b87a080ccddf039fe20b.docx]

Supplementary File A

This file contains all scripts and datasets needed to reproduce the statistical analyses presented in *Conflict and displacement patterns in Somalia: An ecological study of national measles vaccine first‑dose coverage proxies*

# =============================================================================

# somalia_analytic_code.R

# 1. Load libraries (install if missing)

pkgs <- c(

"dplyr", "readr", "sf", "spdep", "raster", "exactextractr",

"broom", "ggplot2", "cowplot", "sandwich", "lmtest"

)

new <- pkgs[!pkgs %in% installed.packages()[,1]]

if(length(new)) install.packages(new, dependencies=TRUE)

library(dplyr); library(readr); library(sf); library(spdep)

library(raster); library(exactextractr)

library(broom); library(ggplot2); library(cowplot)

library(sandwich); library(lmtest)

# 2. Read raw inputs from your project’s raw_data/ folder

acled <- read_csv("raw_data/acled_somalia.csv")

admin2_sf <- st_read("raw_data/gadm_admin2.shp")

# UNHCR forced displacement summary (IDPs)

idp_raw <- read_csv("raw_data/persons_of_concern.csv") %>%

rename(admin2 = admin2_name)

# Coverage proxy (WHO/UNICEF)

coverage_df <- read_csv("raw_data/who_unicef_mcv1.csv") %>%

rename(coverage_mcv1 = coverage) %>%

select(year, coverage_mcv1)

# Built‑up raster for SMOD (unzipped into raw_data/SMOD)

builtup_rast <- raster("raw_data/SMOD/SMOD_2018.tif")

# If you have these files, otherwise drop them:

popdens_df <- read_csv("raw_data/pop_density_by_admin2_year.csv")

fac_df <- read_csv("raw_data/facilities_by_admin2_year.csv")

# 3. Preprocess & merges

# 3a. Aggregate ACLED to admin2–year

conflict_yearly <- acled %>%

st_as_sf(coords = c("longitude","latitude"), crs = 4326) %>%

st_join(admin2_sf, join = st_within) %>%

st_drop_geometry() %>%

count(admin2 = NAME_2, year, name = "conflict_events")

# 3b. Back‑fill IDPs for years <2019 using 2019

idp_filled <- idp_raw %>%

group_by(admin2) %>%

mutate(

idp2019 = idp_count[year == 2019],

idp_count = ifelse(year < 2019, idp2019, idp_count)

) %>%

ungroup() %>%

select(admin2, year, idp_count)

# 3c. Urban/rural classification via 75th‑pct built‑up

built_vals <- exact_extract(builtup_rast, admin2_sf, 'mean')

admin2_sf$builtup_pct <- built_vals / 100

cut75 <- quantile(admin2_sf$builtup_pct, 0.75, na.rm = TRUE)

urban_map <- admin2_sf %>%

mutate(urban_rural = ifelse(builtup_pct >= cut75, "Urban","Rural")) %>%

select(admin2 = NAME_2, urban_rural)

# 4. Build the national × year panel

panel_raw <- conflict_yearly %>%

full_join(idp_filled, by = c("admin2","year")) %>%

left_join(urban_map, by = "admin2") %>%

left_join(popdens_df, by = c("admin2","year")) %>%

left_join(fac_df, by = c("admin2","year")) %>%

left_join(coverage_df, by = "year")

annual_panel <- panel_raw %>%

group_by(year) %>%

summarize(

conflict_events = sum(conflict_events, na.rm = TRUE),

idp_count = sum(idp_count, na.rm = TRUE),

coverage_mcv1 = mean(coverage_mcv1, na.rm = TRUE),

pop_density = mean(pop_density, na.rm = TRUE),

n_facilities = sum(n_facilities, na.rm = TRUE),

urban_rural = first(urban_rural)

) %>%

ungroup()

# 5. Compute Getis‑Ord Gi* hotspots (per year)

hotspot_trends <- panel_raw %>%

filter(!is.na(conflict_events)) %>%

group_by(year) %>%

do({

df <- .

sf <- left_join(df, admin2_sf, by = c("admin2" = "NAME_2")) %>% st_as_sf()

nb <- poly2nb(sf)

lw <- nb2listw(nb, style="W", zero.policy=TRUE)

gi <- localG(sf$conflict_events, lw, zero.policy=TRUE)

data.frame(year = df$year, gi = as.numeric(gi))

}) %>%

ungroup() %>%

group_by(year) %>%

summarize(

n_hotspots = sum(gi > 0, na.rm = TRUE),

n_districts = n(),

pct_hotspots = n_hotspots / n_districts * 100

)

# 6. Table 2: Descriptive statistics

table2 <- annual_panel %>%

left_join(hotspot_trends, by = "year") %>%

summarize(

mean_conflict = mean(conflict_events), sd_conflict = sd(conflict_events),

mean_idp = mean(idp_count), sd_idp = sd(idp_count),

mean_hotspots = mean(pct_hotspots), sd_hotspots = sd(pct_hotspots),

mean_cov = mean(coverage_mcv1), sd_cov = sd(coverage_mcv1)

)

write_csv(table2, "Table2_Descriptives.csv")

# 7. Table 3: OLS regression + clustered SEs, scaled ×10^14

m3 <- lm(

coverage_mcv1 ~ pct_hotspots +

idp_count +

pop_density +

n_facilities +

urban_rural +

factor(year),

data = annual_panel

)

vc <- vcovCL(m3, cluster = annual_panel$year)

tbl <- tidy(m3, conf.int = TRUE, vcov. = vc) %>%

filter(term != "(Intercept)") %>%

mutate(across(c(estimate,std.error,conf.low,conf.high),

~ . * 1e14))

write_csv(tbl, "Table3_Regression_Results.csv")

# 8. Fig S1: Clean 4‑panel diagnostic plot

diag_df <- augment(m3, data = annual_panel)

p1 <- ggplot(diag_df, aes(.fitted, .resid)) +

geom_hline(yintercept = 0, linetype = "dashed") +

geom_point(color="steelblue", alpha=0.7) +

labs(x="Fitted values", y="Residuals") +

theme_bw() + theme(panel.grid=element_blank())

p2 <- ggplot(diag_df, aes(sample=.std.resid)) +

stat_qq(color="darkgreen", alpha=0.7) +

stat_qq_line(color="darkgreen") +

labs(x="Theoretical Quantiles", y="Std Residuals") +

theme_bw() + theme(panel.grid=element_blank())

p3 <- ggplot(diag_df, aes(.fitted, sqrt(abs(.std.resid)))) +

geom_point(color="purple", alpha=0.7) +

labs(x="Fitted values", y=expression(sqrt("|Std Residuals|"))) +

theme_bw() + theme(panel.grid=element_blank())

p4 <- ggplot(diag_df, aes(.hat, .std.resid)) +

geom_point(aes(size=.cooksd), color="firebrick", alpha=0.6) +

scale_size_continuous(name="Cook’s distance") +

labs(x="Leverage", y="Std Residuals") +

theme_bw() + theme(panel.grid=element_blank())

clean_diag <- plot_grid(p1,p2,p3,p4, ncol=2, align="hv", labels=NULL)

ggsave("Supplementary_Diagnostic_Chart_clean.jpg", clean_diag,

width=10, height=8, dpi=300)

ggsave("Supplementary_Diagnostic_Chart_clean.pdf", clean_diag,

width=10, height=8, dpi=300)

# =============================================================================

# End of somalia_analytic_code.R

# =============================================================================
